# Supplementary material
Source: PubMed Central journal article supplement (PMC1839148)

# Supplemental Figure 1 Pham et al.

**A**

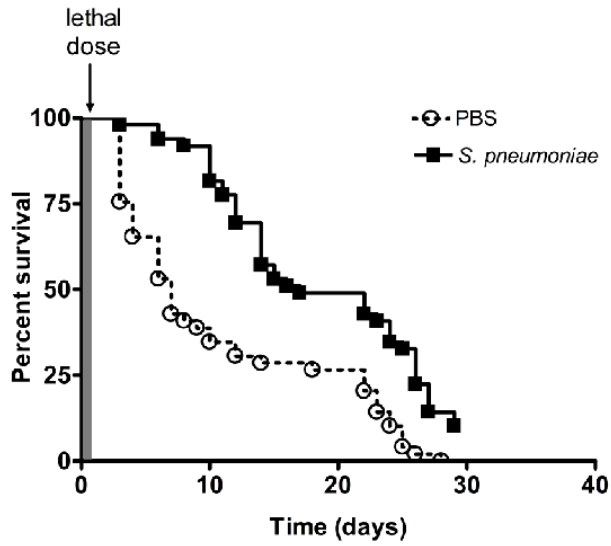

**B**

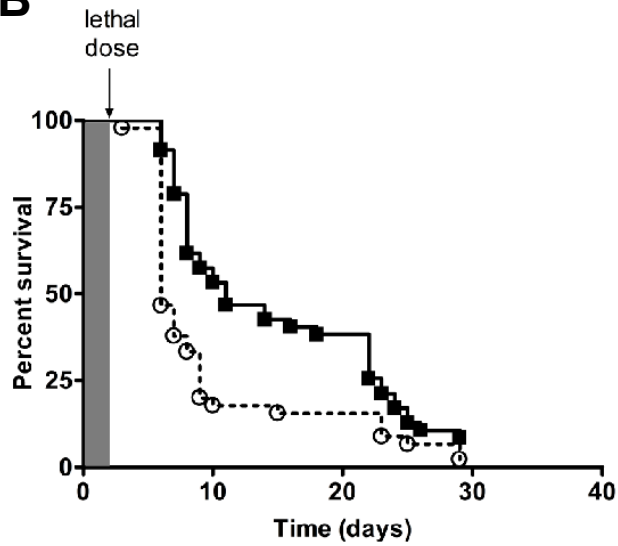

**C**

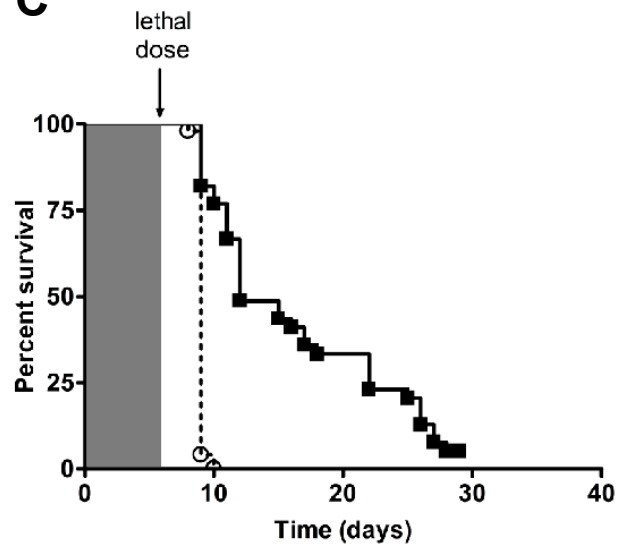

**D**

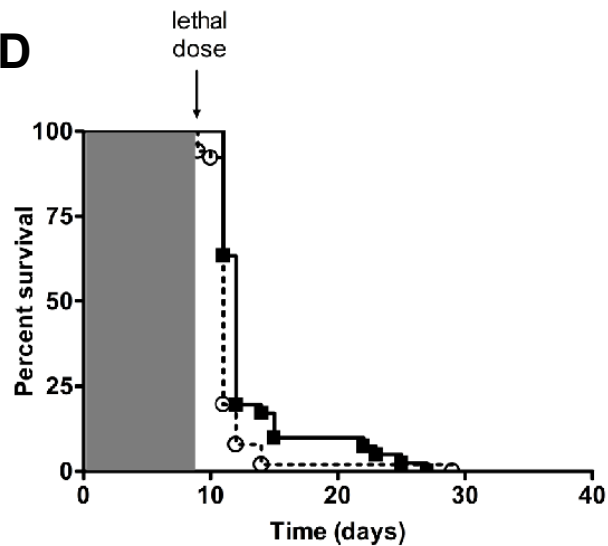

**E**

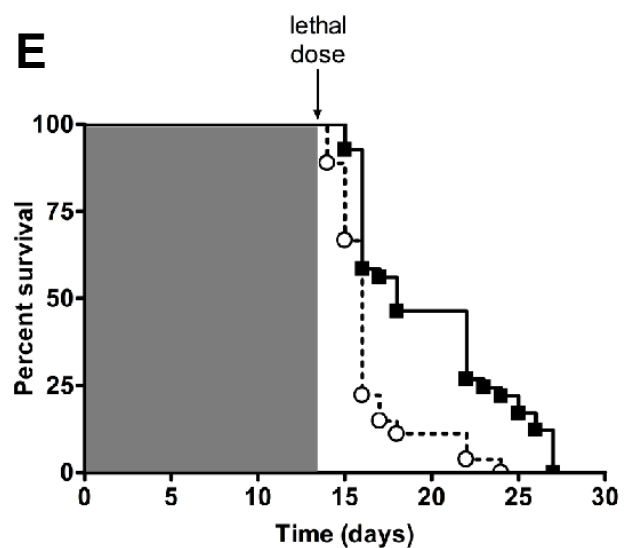

Supplement: ppat.0030026.sg001.pdf [file ppat.0030026.sg001.pdf]

# Supplemental Figure 2 Pham et al.

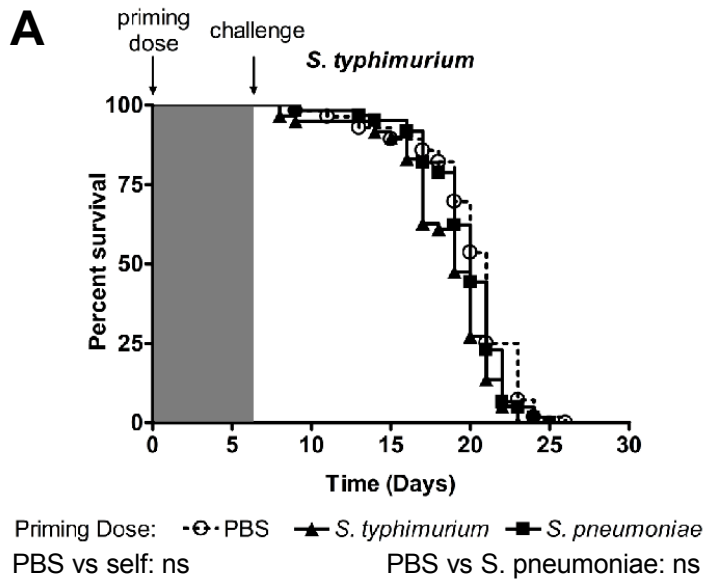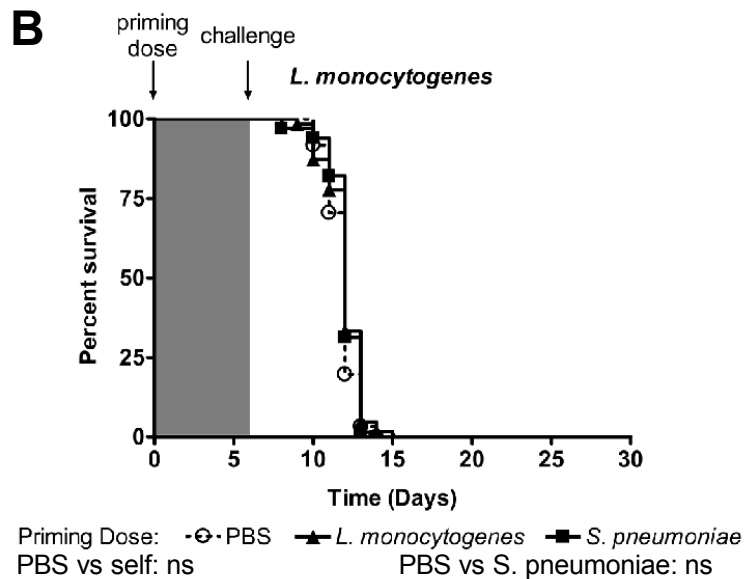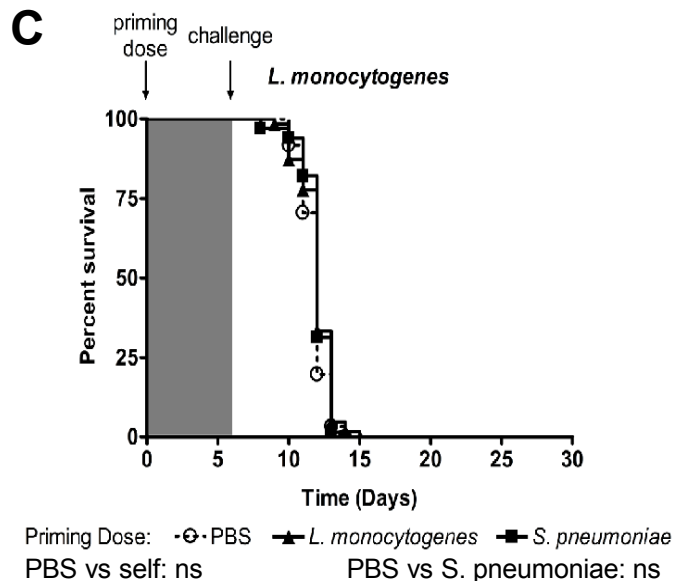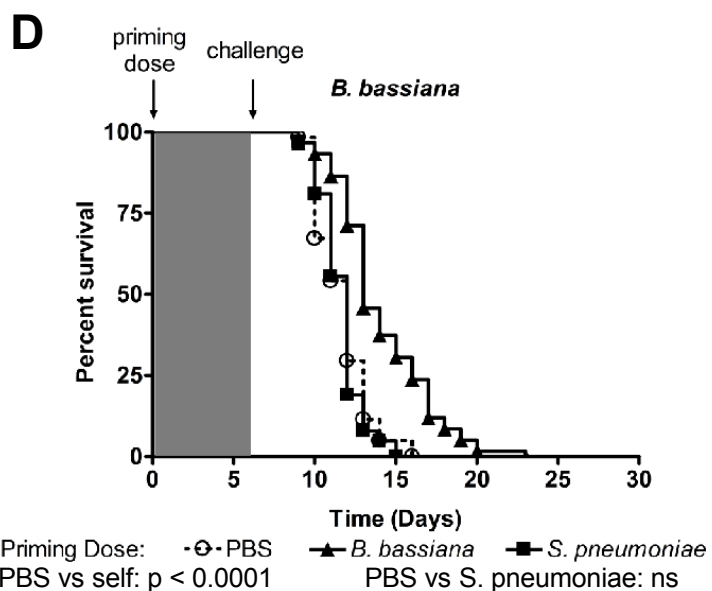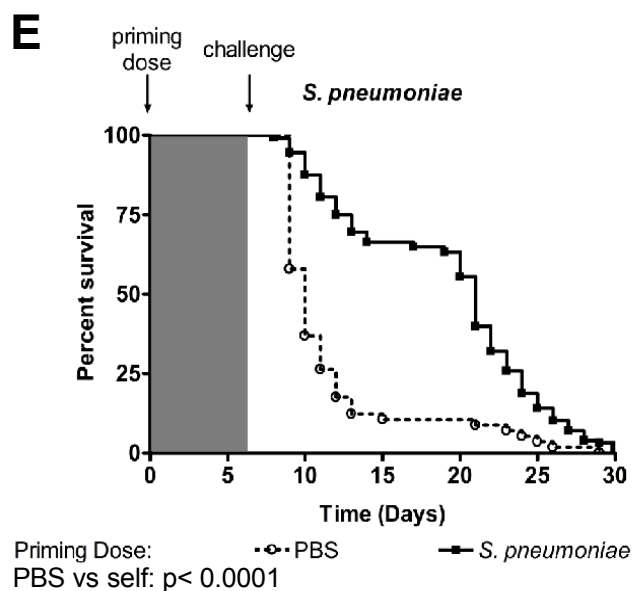

Supplement: ppat.0030026.sg002.pdf [file ppat.0030026.sg002.pdf]

## Supplemental Figure 3 Pham et al.

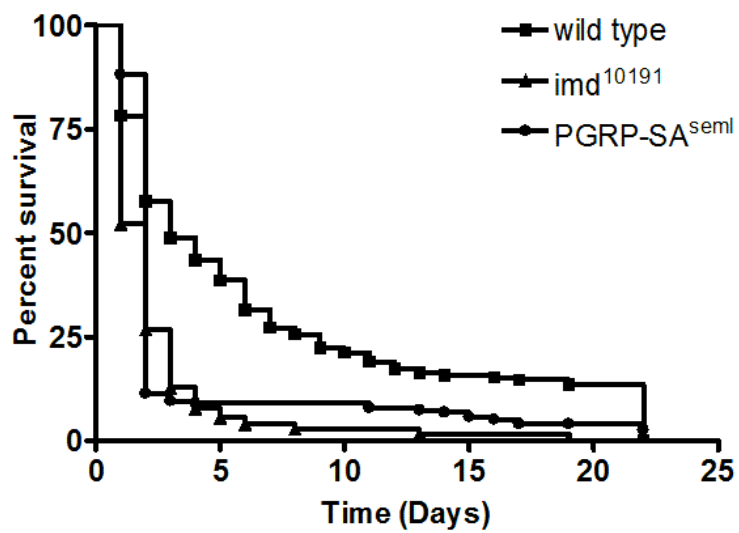

Supplement: ppat.0030026.sg003.pdf [file ppat.0030026.sg003.pdf]

# Supplemental Figure 4 Pham et al.

## A

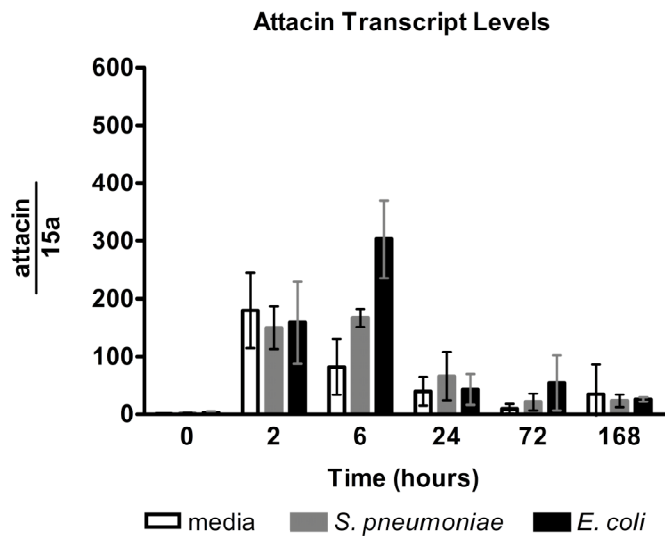

## B

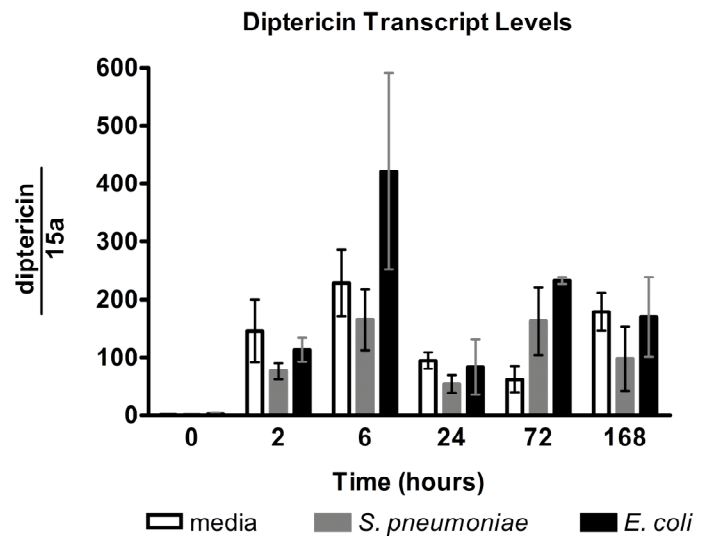

Supplement: ppat.0030026.sg004.pdf [file ppat.0030026.sg004.pdf]
